# Supplementary material for: Oncological Safety of Axillary Reverse Mapping in Patients With Clinically Node-Negative Breast Cancer
Source: Research Square preprint supplement (doi:10.21203/rs.3.rs-501178/v1), 2021-05-17
Supplement: Supplementary file 1 [file 7d82d9ecf89de56ad3097e9b.xlsx]

## Sheet: Sheet1
	Table 2. Surgical procedure and results in the cN0 patients
	(1) Surgical procedure		(3) ARM
	(a) Mastectomy		ARM node identified in SLN field	63%(321/507)
	Partial/ total / none	244/244/19	ARM node identified in ALND field	93%(65/70)
	(b) Axillary surgery		Number of identified ARM nodes in ALND field	7.2 (0-25)
	SLN biopsy alone	437	ARM node involvement	26%(18/70)
	SLN biopsy followed by ALND	70	(4) Relationship between SLN and ARM nodes
	(2) SLN		Crossover of SLN-ARM node	28%(140/499)
	Identification rate of SLN	98% (499/507)	Involved ARM node is the same as the SLN	78%(14/18)
	Number of identified SLNs	2 (1-9)
	SLN involvement	19% (95/499)
	ALND: axillary lymph node dissection; ARM: axillary reverse mapping; SLN: sentinel lymph node
